# Supplementary material for: Ingenuity pathways analysis of urine metabolomics phenotypes toxicity of Chuanwu in Wistar rats by UPLC-Q-TOF-HDMS coupled with pattern recognition methods
Source: Royal Society of Chemistry journal article supplement (doi:10.1039/c1mb05366c), 2012-01-27
Supplement: c1mb05366c.pdf [file c1mb05366c.pdf]

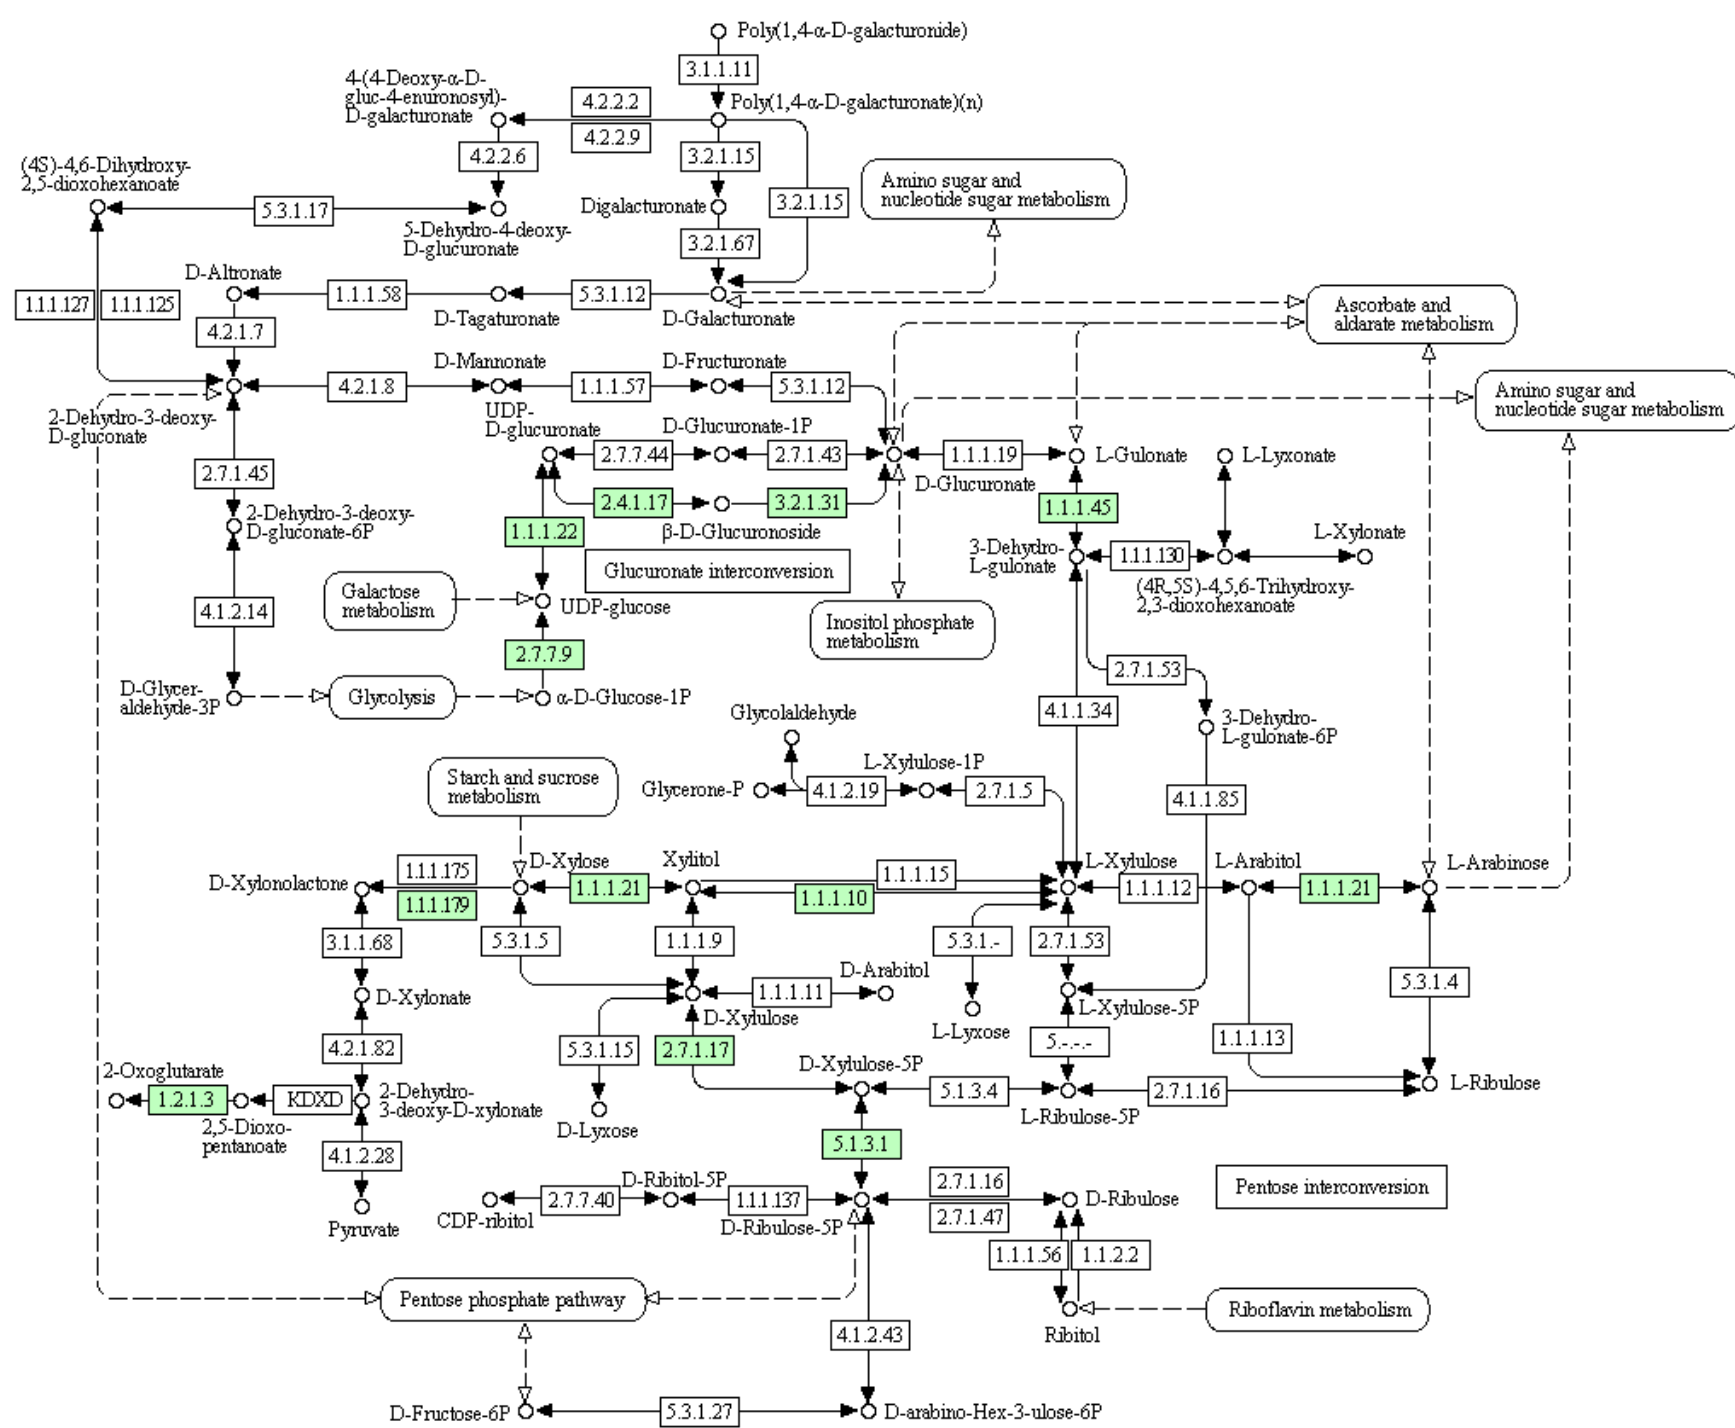

Figure S1. Overview of pentose and glucuronate interconversions with MetPA.

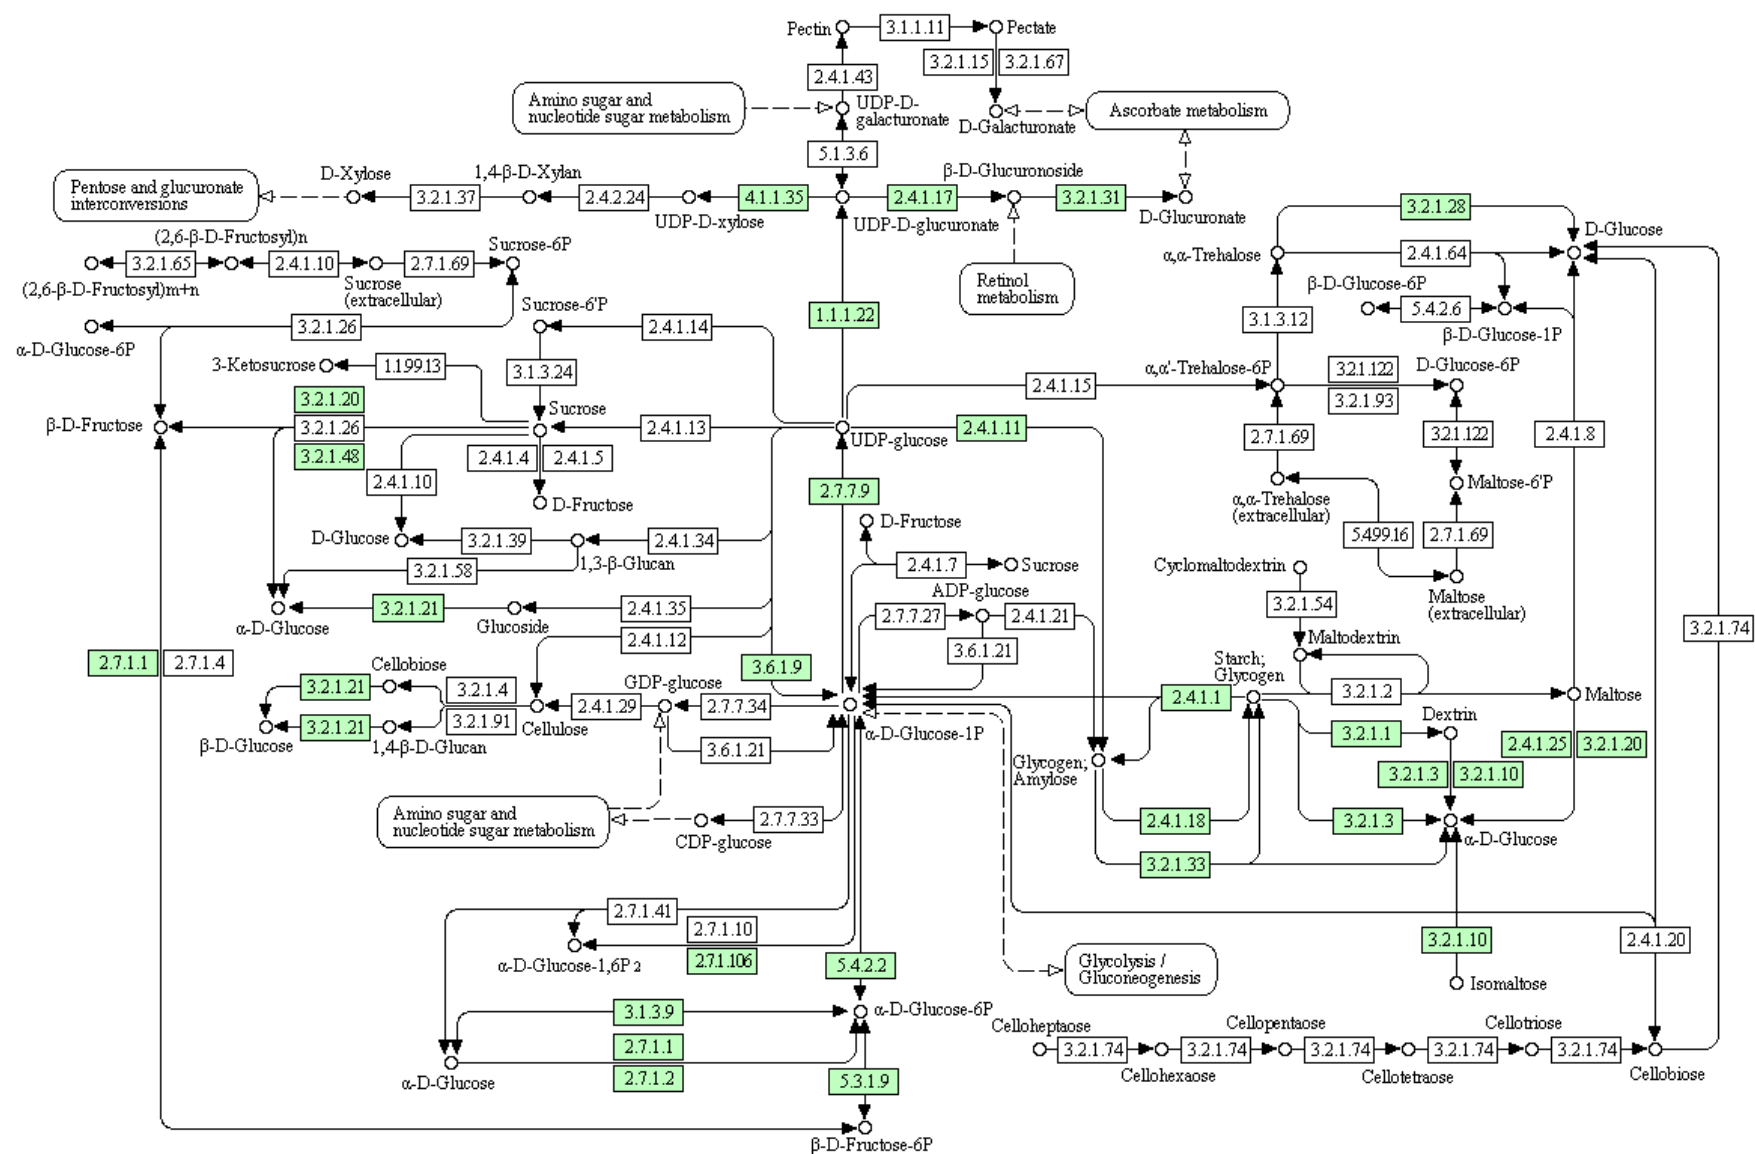

Figure S2. Overview of starch and sucrose metabolism with MetPA.

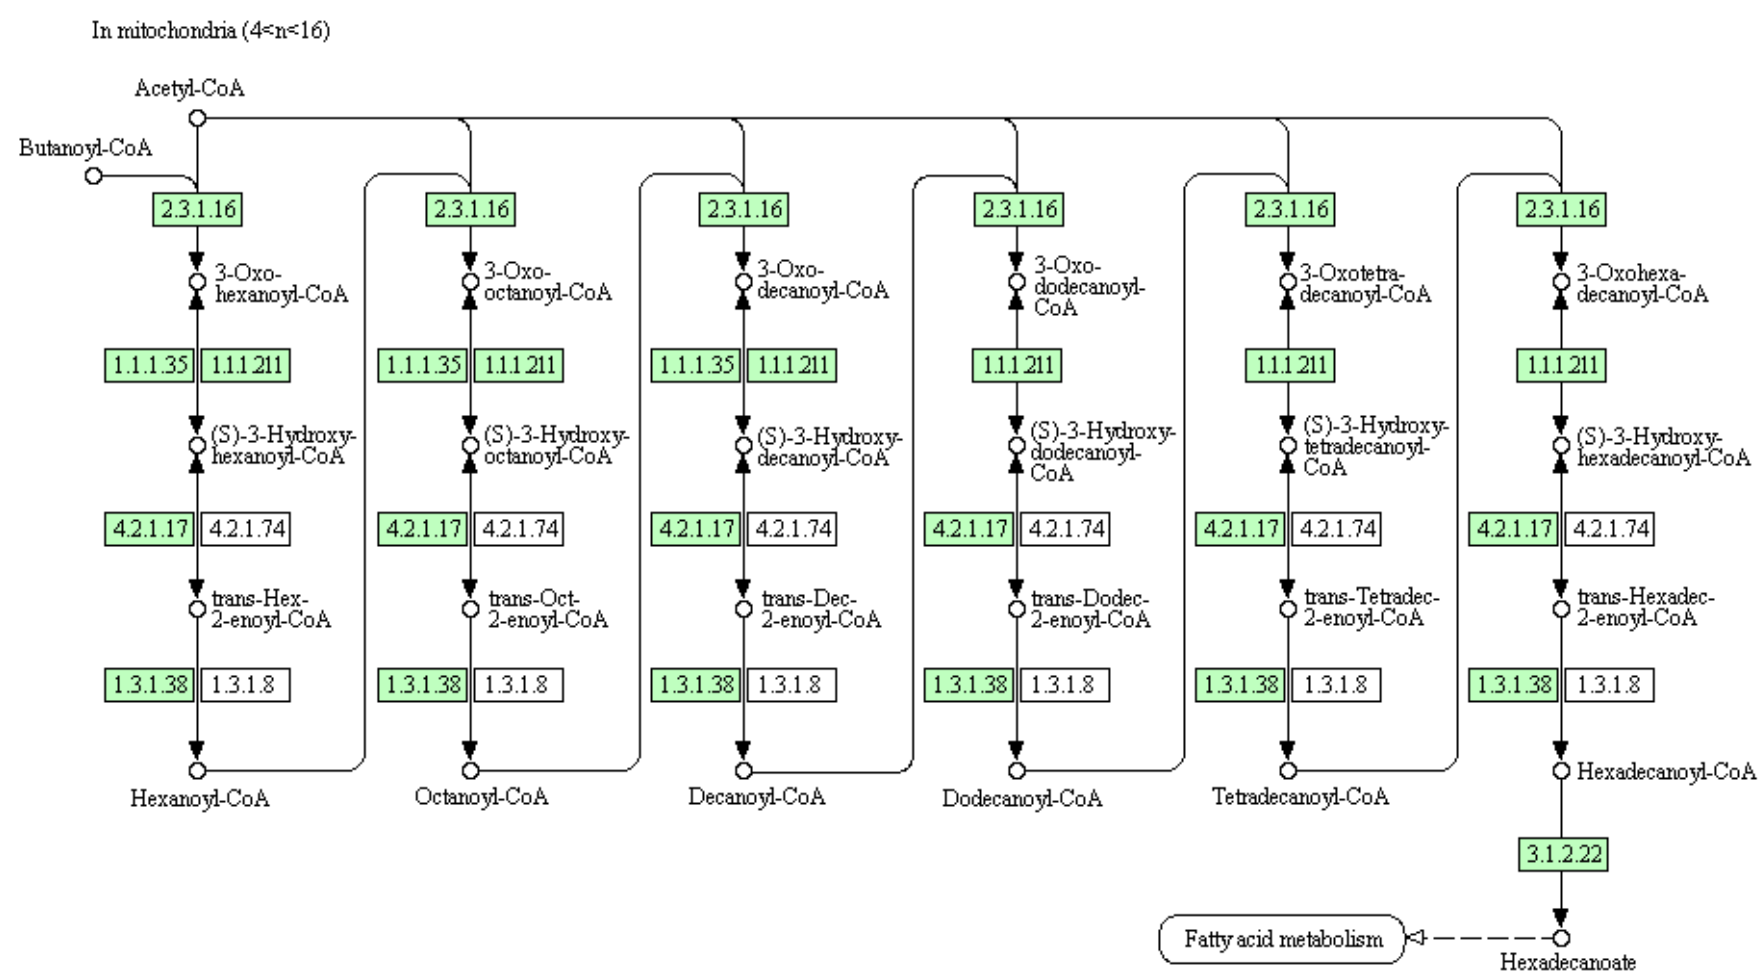

Figure S3. Overview of fatty acid elongation in mitochondria with MetPA.

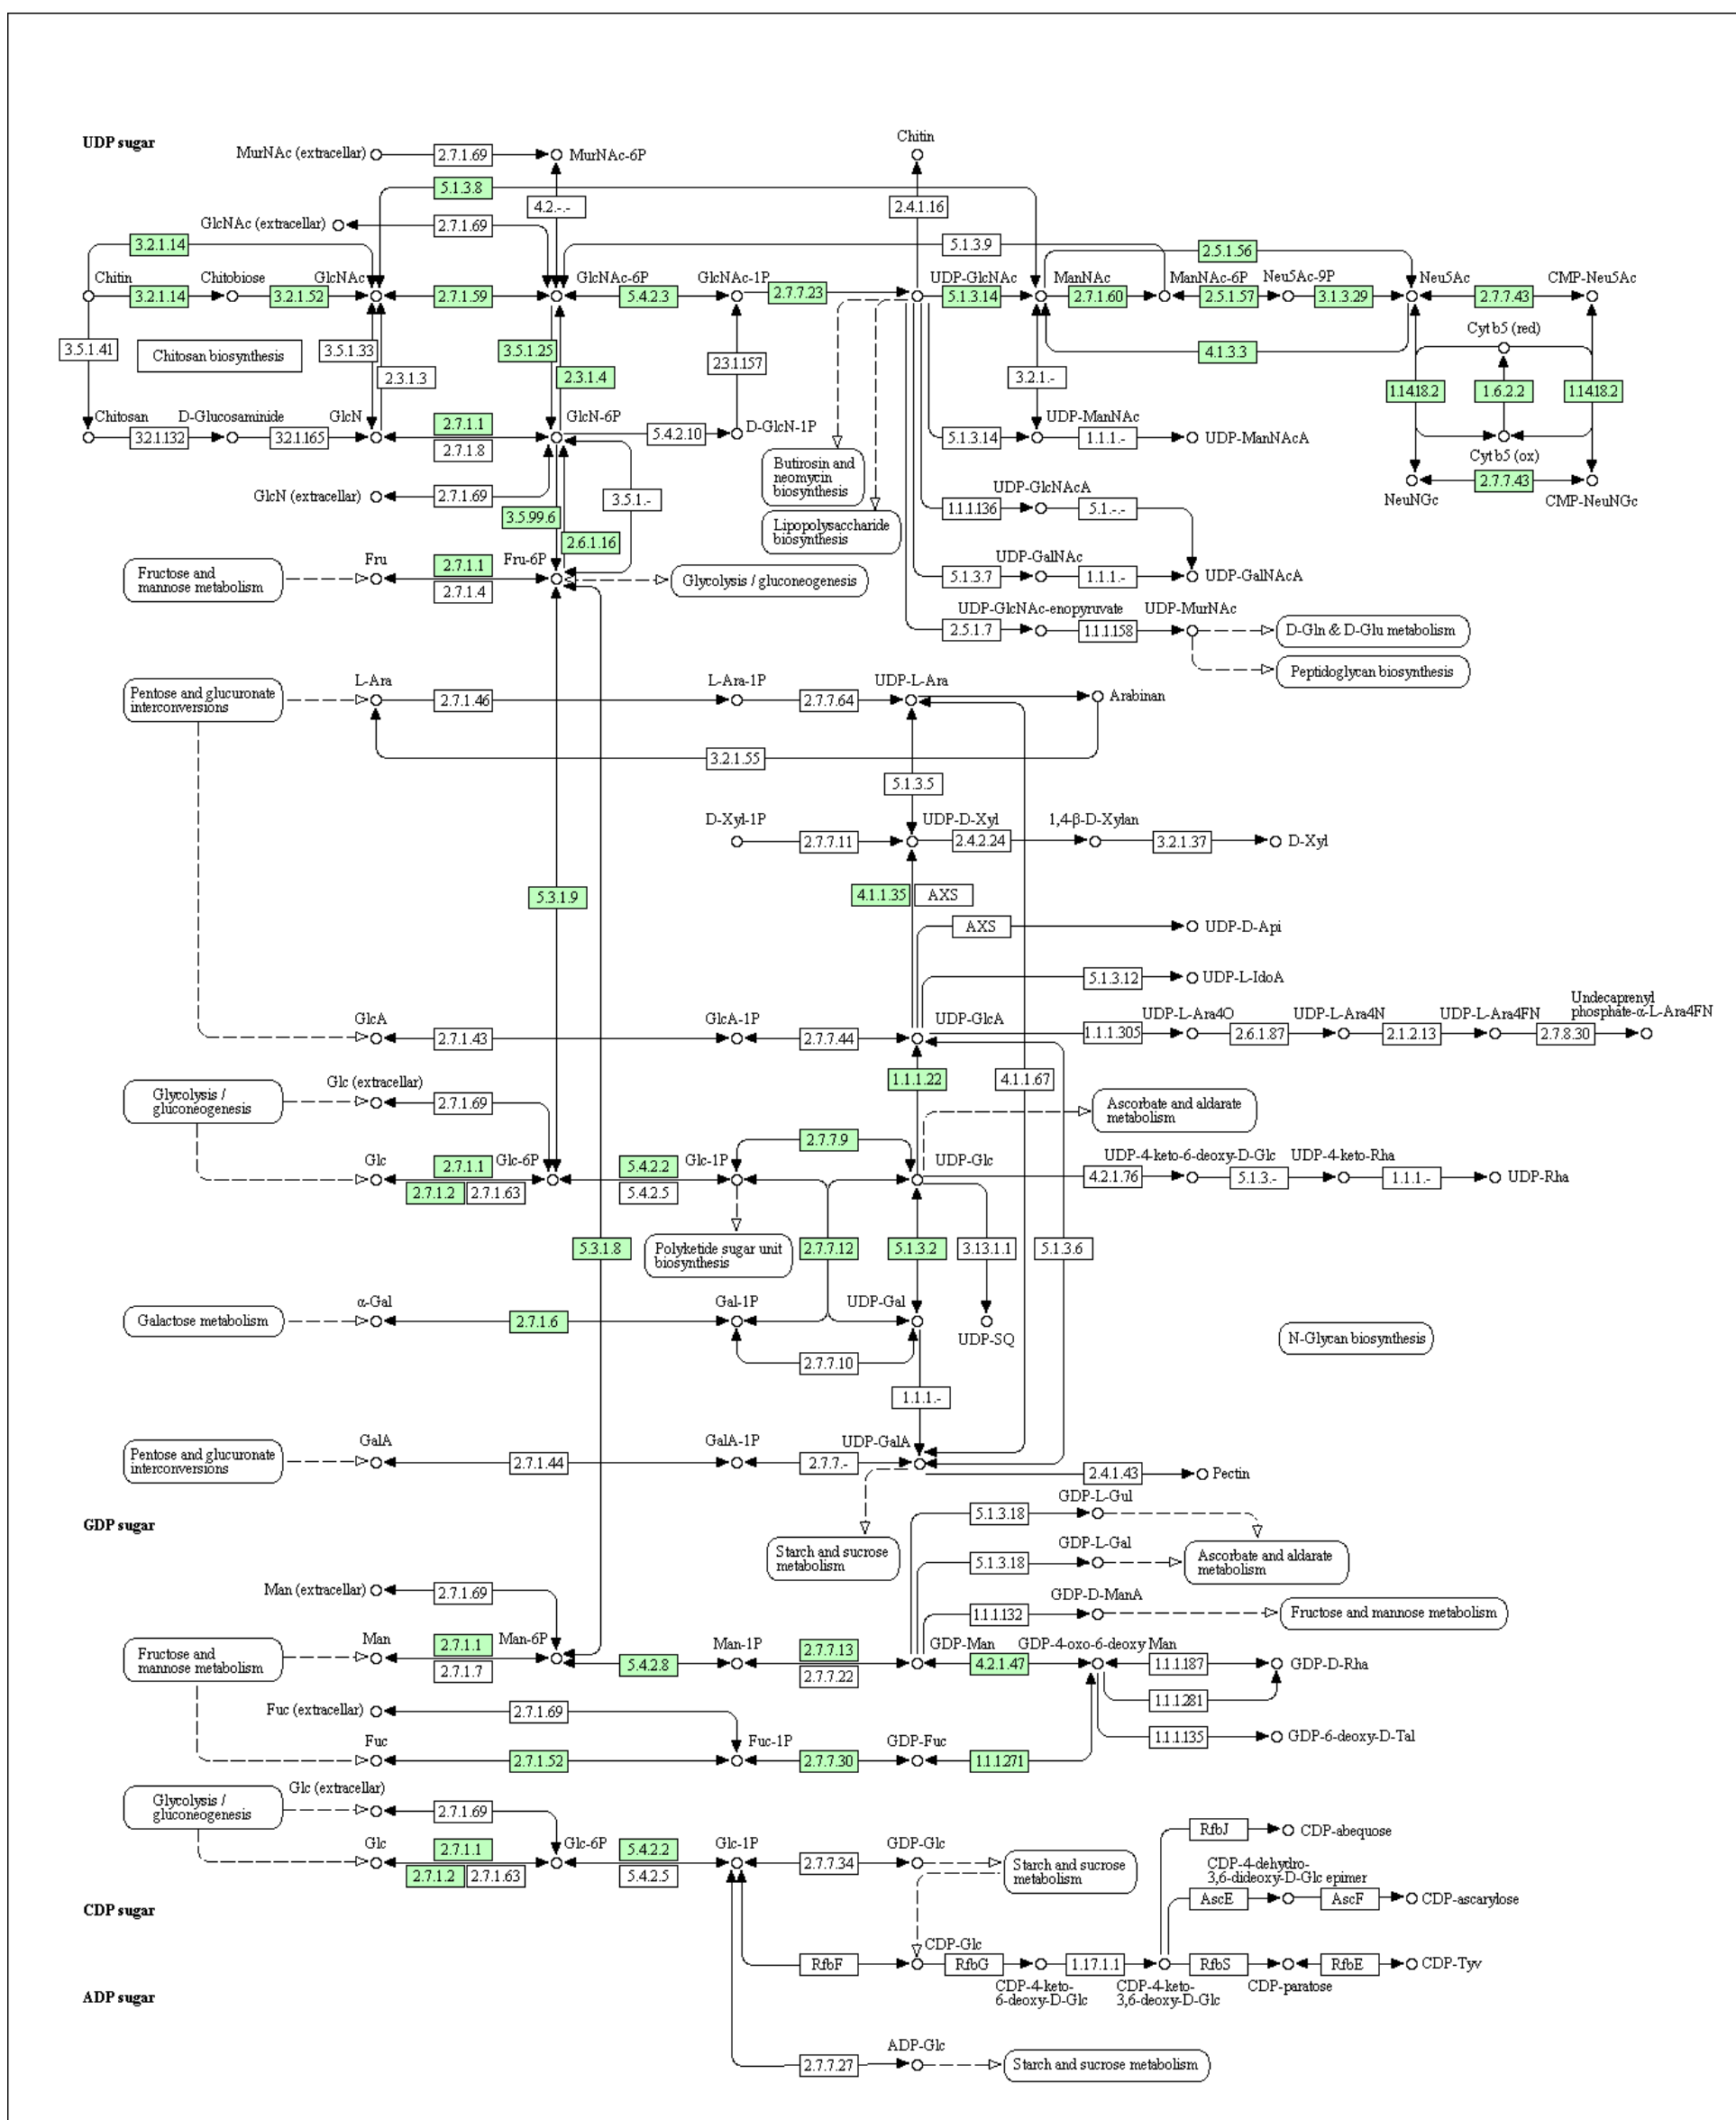

Figure S4. Overview of amino sugar and nucleotide sugar metabolism with MetPA.

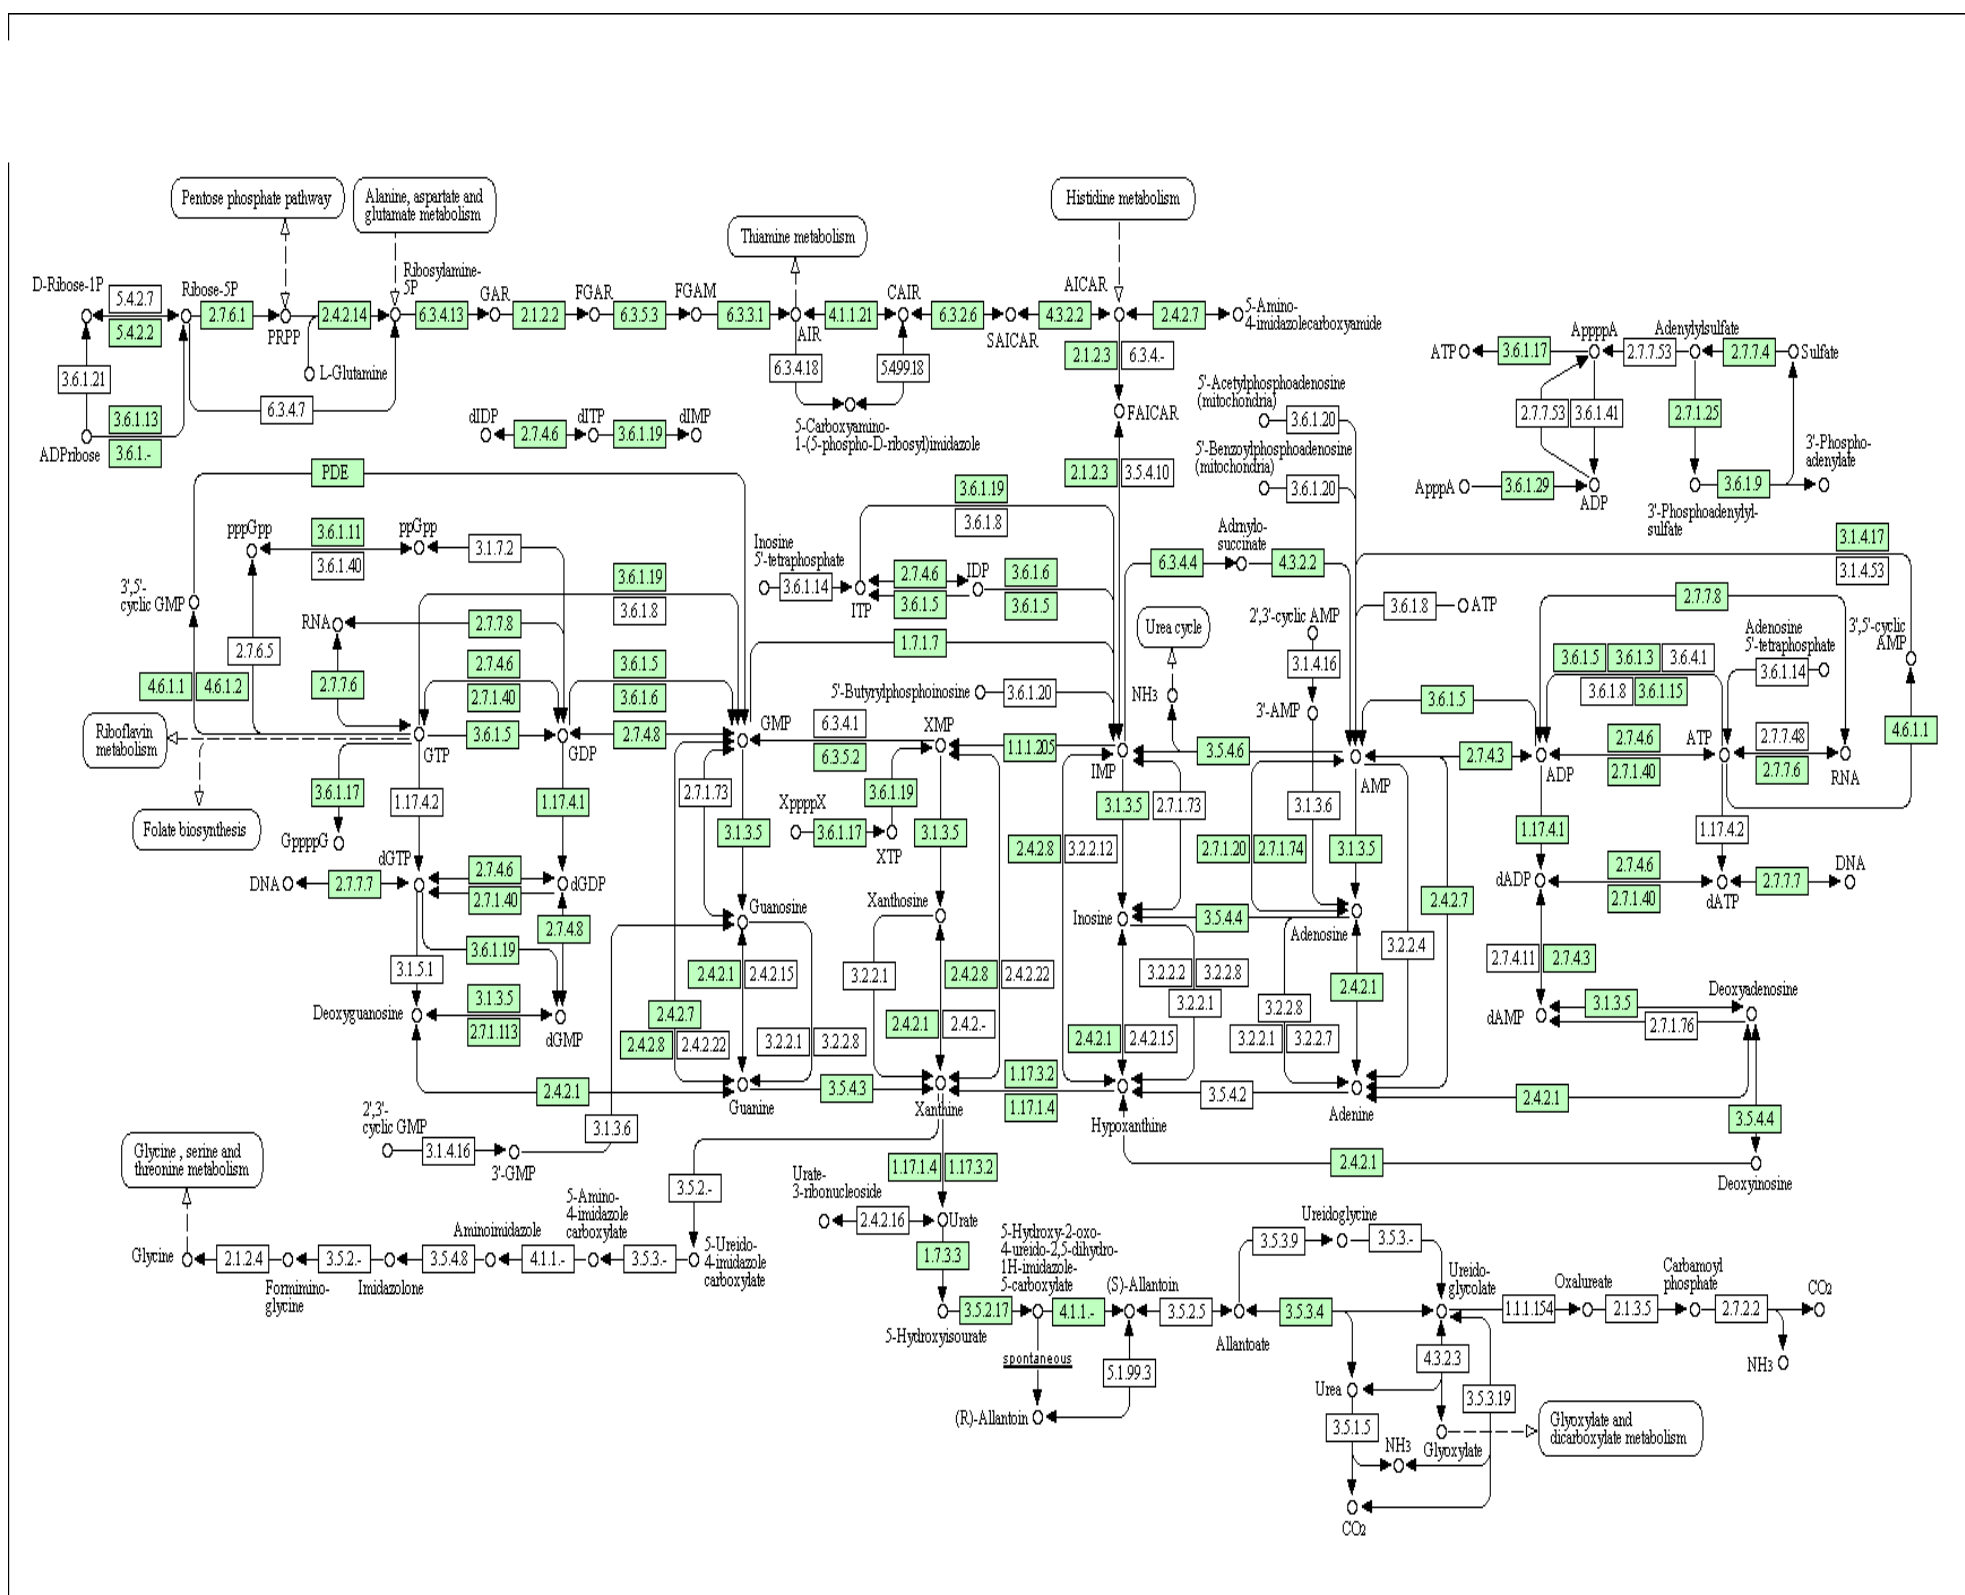

Figure S5. Overview of purine metabolism with MetPA.
